# Supplementary material
Source: PubMed Central journal article supplement (PMC4533246)
Supplement: peds.2014-2501_peds.2014-2501SupplementaryData.pdf [file peds.2014-2501_peds.2014-2501SupplementaryData.pdf]

## Supplemental Information

**SUPPLEMENTAL TABLE 5** Clinic Population Demographics

| Characteristic                            | Entire Clinic Population          | Did Not Consent for Hair Sample   | Consented for Hair Sample         | <i>P</i> |
|-------------------------------------------|-----------------------------------|-----------------------------------|-----------------------------------|----------|
| <i>n</i>                                  | 227                               | 82                                | 145                               |          |
| <b>Demographics</b>                       |                                   |                                   |                                   |          |
| Gender, % male                            | 61.7                              | 56.1                              | 64.8                              | .19      |
| Age, y                                    | 2.02 ± 2.17 (0.12–13.59)          | 2.18 ± 2.75 (0.33–13.59)          | 1.94 ± 1.76 (0.12–9.47)           | .43      |
| Race, % nonwhite                          | 66.1                              | 67.1                              | 65.5                              | .81      |
| Gestation, wks                            | 27.1 ± 3.1 (22.9–36.0)            | 26.9 ± 3.2 (23.0–35.6)            | 27.2 ± 3.1 (22.9–36.0)            | .47      |
| Birth weight, g                           | 973 ± 483 (380–3150) <sup>b</sup> | 930 ± 494 (380–3150) <sup>c</sup> | 998 ± 477 (390–2650) <sup>d</sup> | .32      |
| Birth weight, percentile                  | 39.0 ± 25.0 (1–95) <sup>b</sup>   | 34.2 ± 25.3 (2–95) <sup>c</sup>   | 41.7 ± 24.5 (1–90) <sup>d</sup>   | .031     |
| <b>Socioeconomic status</b>               |                                   |                                   |                                   |          |
| Median household income (\$, thousands)   | 66.3 ± 22.1 (15.6–156.6)          | 67.8 ± 20.5 (15.6–108.6)          | 65.4 ± 23.0 (25.2–156.6)          | .44      |
| Public insurance                          | 62.1                              | 61.0                              | 62.8                              | .79      |
| High school education or less             | 27.7 <sup>e</sup>                 | 27.5 <sup>c</sup>                 | 27.9 <sup>d</sup>                 | .96      |
| <b>Clinical characteristics</b>           |                                   |                                   |                                   |          |
| Age at discharge from NICU, mo            | 4.5 ± 3.4 (0.0–24.5)              | 4.3 ± 2.6 (0–16.6)                | 4.7 ± 3.8 (0.2–24.5)              | .35      |
| Home supplemental oxygen                  | 41.4                              | 42.7                              | 40.7                              | .77      |
| Home ventilator                           | 5.3                               | 1.2                               | 7.6                               | .039     |
| Gastrostomy tube                          | 32.6                              | 32.9                              | 32.4                              | .94      |
| Nissen                                    | 23.4                              | 26.8                              | 21.4                              | .35      |
| Inhaled corticosteroid use before age 2 y | 83.7                              | 81.7                              | 84.8                              | .54      |
| Technology dependent <sup>a</sup>         | 53.3                              | 52.4                              | 53.8                              | .84      |

Values are presented as the mean ± SD (range) or %.

<sup>a</sup> Presence of any of the following: home supplemental oxygen, home ventilator, gastrostomy tube, or Nissen fundoplication.

<sup>b</sup> *n* = 221.

<sup>c</sup> *n* = 80.

<sup>d</sup> *n* = 140.

<sup>e</sup> *n* = 220.
